# Association between mean platelet volume and pulmonary embolism: a systematic review and meta-analysis

Wenyi Lin<sup>1,\*</sup>, Yu Wu<sup>2,\*</sup>, Xuan Lu<sup>1</sup>, Yu Hu<sup>1</sup>

<sup>1</sup>Institute of Hematology, Union Hospital, Tongji Medical College, Huazhong University of Science and Technology, Wuhan 430022, China

<sup>2</sup>Department of Ultrasound, Union Hospital, Tongji Medical College, Huazhong University of Science and Technology, Wuhan 430022, China

\*Equal contribution

**Correspondence to:** Yu Hu, Xuan Lu; **email:** [dr\\_huyu@126.com](mailto:dr_huyu@126.com), <https://orcid.org/0000-0002-2815-4568>; [luxuan20@163.com](mailto:luxuan20@163.com), <https://orcid.org/0000-0002-8010-8075>

**Keywords:** mean platelet volume, pulmonary embolism, early death, risk stratification, meta-analysis

**Received:** November 6, 2020

**Accepted:** May 31, 2021

**Published:** July 2, 2021

**Copyright:** © 2021 Lin et al. This is an open access article distributed under the terms of the [Creative Commons Attribution License](https://creativecommons.org/licenses/by/3.0/) (CC BY 3.0), which permits unrestricted use, distribution, and reproduction in any medium, provided the original author and source are credited.

## ABSTRACT

Platelet activation plays an important role in the progression of pulmonary embolism (PE). Mean platelet volume (MPV) can serve as a marker of platelet activity in patients with PE. Many studies have reported different results regarding the relationship. Therefore, we aimed to perform a systematic review and meta-analysis to evaluate the relationship between MPV and PE. Two reviewers independently searched relevant articles in databases from inception to April 21, 2021 and identified all studies on MPV and PE as the outcomes of interest. Further, we selected studies meeting the criteria and extracted the data. Of the 2505 publications identified, we included 18 studies after screening. Results showed MPV was significantly higher in patients with PE (0.83 fL, 95% CI: 0.38-1.28,  $P < 0.001$ ) than in controls. The mean difference in MPV between those who died and survivors of PE was 1.23 fL (95% CI: 0.96-1.51,  $P < 0.001$ ). Hence, an increased MPV is associated with PE. MPV could be a useful tool to predict the occurrence and death risk of PE together with other risk factors.

## INTRODUCTION

Pulmonary embolism (PE) is a clinical pathological syndrome caused by various types of emboli (thrombus being the most common). These emboli block the main pulmonary artery or its branches, sometimes causing a life-threatening condition. On the one hand, low-risk PE can be asymptomatic or identified incidentally, with a mortality rate of less than 1% [1]. On the other hand, high-risk PE, which presents as shock or persistent hypotension, is a life-threatening condition associated with high mortality and morbidity, with an overall mortality rate exceeding 10% within 30 days [2–5]. Early assessment of PE risk plays an important role in guiding clinical treatment and reducing patient mortality. In recent years, computed tomography pulmonary angiography (CTPA) and magnetic

resonance imaging (MRI) have been widely used to diagnose patients with PE. However, these examinations are relatively costly and therefore less feasible and of limited use in primary hospitals.

Recently, many studies have reported that in the early stage of PE, various visible and invisible components that produce hypercoagulable substances are found in the patients' blood. This detection can sensitively reflect PE. Mean platelet volume (MPV), a measurement of platelet size, is a widely used indicator assessing platelet function and activity [6, 7]. Large-sized platelets contain more dense granules, generate more vasoactive and prothrombotic factors (e.g., thromboxane A<sub>2</sub>, serotonin, and adenosine triphosphate), secrete more membrane receptors (e.g., P-selectin and glycoprotein IIb/IIIa), and aggregate more rapidly [7–

9]. A high MPV indicates a rapid hemostatic reaction and a higher thrombotic propensity [10, 11]. Therefore, MPV can be used as a predictor of the occurrence and poor prognosis of thrombotic diseases.

A meta-analysis on thrombosis and MPV published in 2017 reported that the onset of PE had no significant effect on the standardized mean difference (MD) of MPV between patients with PE and controls [12]. However, large sample studies on MPV and PE were subsequently conducted [13, 14], and they showed a significant increase in MPV among patients with new PE onset and recurrent PE. A meta-analysis published in 2020 demonstrated an increased MPV associated with PE but not assessed the use of MPV as an indicator for the risk prediction and risk stratification of PE [15]. In view of this, we conducted a systematic review and meta-analysis with an aim to further evaluate the relationship between MPV and PE.

## MATERIALS AND METHODS

The meta-analysis was carried out according to PRISMA guidelines [16].

### Search strategy

Two reviewers (WY Lin and X Lu) independently searched relevant studies in the PubMed, Web of Science, SCOPUS, and OVID (including Embase and Medline) databases from their inception to April 21, 2021, using the search terms (“pulmonary embolism” OR “PE” OR “pulmonary thromboembolism” OR “PTE” OR “lung embolism”) AND (“mean platelet volume” OR “MPV” OR “platelet indices” OR “platelet parameters”). In addition, reference lists of the relevant studies were reviewed to identify eligible studies.

### Selection criteria

We included studies according to the following criteria: 1) a cohort or case–control design; 2) a clear diagnosis of PE by CT, CTPA, or MRI; 3) reporting the mean and standard deviation (SD) of MPV for patients with PE and controls or for survivor and death groups, or reporting frequencies for subjects in high-/low-MPV groups, numbers of patients and subjects or controls, or odds ratios (OR)/risk ratios (RR)/hazard ratios (HR) with 95% confidence intervals (CI); 4) full text available.

Studies were excluded if they were duplicates, non-English, reviews, letters, case reports, books, meeting abstracts (with no data of the outcome), nonhuman, did not provide data of MPV, did not include an outcome of PE or early death, and did not include a control group.

Further, studies that reported MPV with median values and studies in which participants had concurrent diseases that influenced the outcomes of interest were also excluded. For the same study with several publications, we chose the most recent data or the paper with the longest follow-up, or we contacted the primary/corresponding author to confirm differences between these studies, when necessary.

All identified studies were screened initially by their title or abstract, and then by their full text. Two reviewers (WY Lin and X Lu) independently evaluated each study, and inconsistent articles were checked by the corresponding author (Y Hu).

### Data extraction

The reviewers then independently extracted information of the included studies in a Microsoft Excel spreadsheet. The study information included details of the authors, year, region, study design, data source, data collection period, follow-up duration, diagnostic criteria, standards of risk stratification, inclusion criteria of participants, and number of cases and controls or survivors and non-survivors, and number of high-/medium-/low-risk cases. In addition, we recorded statistical information of the number of events at follow-up, mean and SD of MPV, OR, RR, HR with 95% CI, the number and type of covariates considered in analyses, sample size, average patient age, proportion of males, and PE detection methods (including whether samples were collected with ethylenediaminetetraacetic acid (EDTA), time before measurement, and details of testing analyzers). Finally, we collected clinical information on the percentage of smokers, percentage of subjects with diabetes mellitus and hypertension, whether participants received anticoagulation therapy, history of deep vein thrombosis (DVT), and history of cardiovascular diseases or other diseases influencing the outcome of interest. Controversial information was re-reviewed by consensus or judged the corresponding author (Y Hu). Missing data were obtained by consulting the primary authors of the studies.

### Risk of bias assessment

Risk of bias for included studies was evaluated independently by the two reviewers with the Newcastle–Ottawa Scale (NOS) [17]. This scale assesses the selection of the study participants, the comparability of patients and controls in case–control studies and exposed and nonexposed participants in cohort studies, and the ascertainment of exposure or outcome. Disagreement was resolved by consensus or judged by the corresponding author.

## Statistical analysis

For continuous outcomes, the mean differences (MD) in MPV between patients and controls or survivors and non-survivors in each study was evaluated; then, weighted mean differences (WMD) and 95% CI were pooled. For dichotomous outcomes, OR, RR, and HR with 95% CI were calculated or obtained directly from the study data on PE or early death among high- versus low-MPV participants. Heterogeneity among studies was measured with the chi-square test, whereas the degree of heterogeneity was calculated with I-square ( $I^2$ ) statistics. When heterogeneity was significant ( $P < 0.1$  or  $I^2 > 50\%$ ), a random effects model was used; otherwise, a fixed effects model was used [18, 19].

The sources of heterogeneity were analyzed with a meta-regression model and subgroup analysis by region, testing time, analyzer, smoking, diabetes mellitus, type of disease, and the score of NOS. Sensitivity analysis was applied to increase the credibility and robustness of the final results, mainly by deleting each of the included studies, one at a time, and then analyzing the pooling effect and heterogeneity of the remaining papers. Publication bias was evaluated by constructing a funnel plot, performing Egger's test, and calculating Begg-Mazumdar Kendall's tau value [20, 21]. All statistical tests were two-sided, and  $P < 0.05$  denoted significance, in addition to the heterogeneity test that was set at 0.1. All analyses mentioned above were performed in STATA statistical software, version 14.0.

## RESULTS

A total of 2505 relevant publications were identified, and the screening process was done as shown in Figure 1. Finally, 18 studies met the selection criteria and were included in the meta-analysis, with 14 studies on PE [3, 14, 22–33] and 7 studies on early death of patients due to PE [3, 13, 24, 26, 34–36].

All included studies were case-control studies, and they included 2674 patients and 1192 controls in total. Most studies were conducted in Turkey, except one study in China, one in Poland, one in Italy, one in Iran and one in Egypt. The mean age of all subjects ranged from 40 to 74 years, and the percentage of males, smokers, and patients with diabetes ranged from 40% to 59%, 19% to 54%, and 8% to 30%, respectively. Other characteristics of each study are shown in Table 1 and Supplementary Table 1.

### Pooling PE events as outcome

In the meta-analysis of studies on PE, a larger MPV was found in cases versus controls with a WMD of 0.83 fL (95% CI: 0.38–1.28,  $P < 0.001$ ). However, the hetero-

geneity was substantial, and hence, a random effects model was used (chi-square = 418.81,  $df = 13$ ,  $I^2 = 96.9\%$ ,  $P < 0.001$ ) (Figure 2). A meta-regression analysis was conducted, and the results showed that age, smoking and type of disease might be sources of heterogeneity (coefficient = -0.076,  $P = 0.007$ ; coefficient = -1.17,  $P = 0.001$ ; coefficient = 1.34,  $P < 0.001$ , respectively). The subgroup analysis showed disease type might be a source of heterogeneity and the pooled MD of MPV in the subgroup of PE patients with DVT was more significant than that without DVT (Figure 3 and Supplementary Table 2). The sensitivity analysis suggested that the finding regarding the role of MPV in PE was robust because pooling MPV and the heterogeneity did not vary substantially, no matter which study was removed (Figure 4 and Supplementary Table 3). The funnel plot presented symmetry (Supplementary Figure 1), and Begg's test and Egger's test did not reveal evidence of publication bias (Begg's test,  $P = 0.584$ ; Egger's test,  $P = 0.145$ ).

### Pooling early death as outcome

Characteristics of each study on early death of PE are shown in Table 1 and Supplementary Table 4. The pooled MD of MPV between those who died and survivors was approximately 1.23 fL (95% CI: 0.96–1.51,  $P < 0.001$ ). A random effects model was used for large heterogeneity (chi-square = 18.61,  $df = 6$ ,  $I^2 = 67.8\%$ ,  $P = 0.005$ ). The subgroup analysis found that disease type might be a source of heterogeneity, which was significantly declined in the subgroup of PE patients with DVT. (Figure 5 and Supplementary Table 5). The sensitivity analysis indicated a stable pooling result (Figure 6 and Supplementary Table 6). However, the heterogeneity lowered to 0.6% after removing the study by Ertem AG, et al. [31], in which more than half of the patients had DVT as a complication. In addition, the funnel plot exhibited significant asymmetry, reflecting the existence of publication bias (Supplementary Figure 2).

## DISCUSSION

We conducted a systematic review and meta-analysis of 18 studies that analyzed the association between MPV and PE. Our results indicated that MPV was significantly higher, approximately 0.83 fL, in patients with PE than in controls, and MPV was 1.23 fL higher in those who died than in survivors of PE.

Some meta-analyses have been performed to assess the relationship between MPV and arterial thrombosis such as coronary artery disease and ischemic heart disease [37–39]. The results showed that patients with arterial thrombosis had higher MPVs than controls. Moreover, the study by Kovacs S, et al. [12] had reached a consensus on the association between MPV and venous thrombo-

embolism (VTE), which demonstrated that the pooled MD of MPV was 0.69 fL between patients and controls. Additionally, the meta-analysis by Febra C, et al. [15] had described an increased MPV associated with PE. However, the study by Febra C did not include sufficient research and not find a significant source of high heterogeneity for the pooled result of MPV. Moreover,

some studies showed differences in MPV between died PE patients and survivors [3, 13, 24, 26, 34–36], but there was no meta-analysis evaluating the predictive capacity of MPV for the early death of PE. Our meta-analysis pooled various results of relevant studies to address this issue and fully assess the role of MPV in the risk prediction of PE and the prophylaxis of early death due to PE.

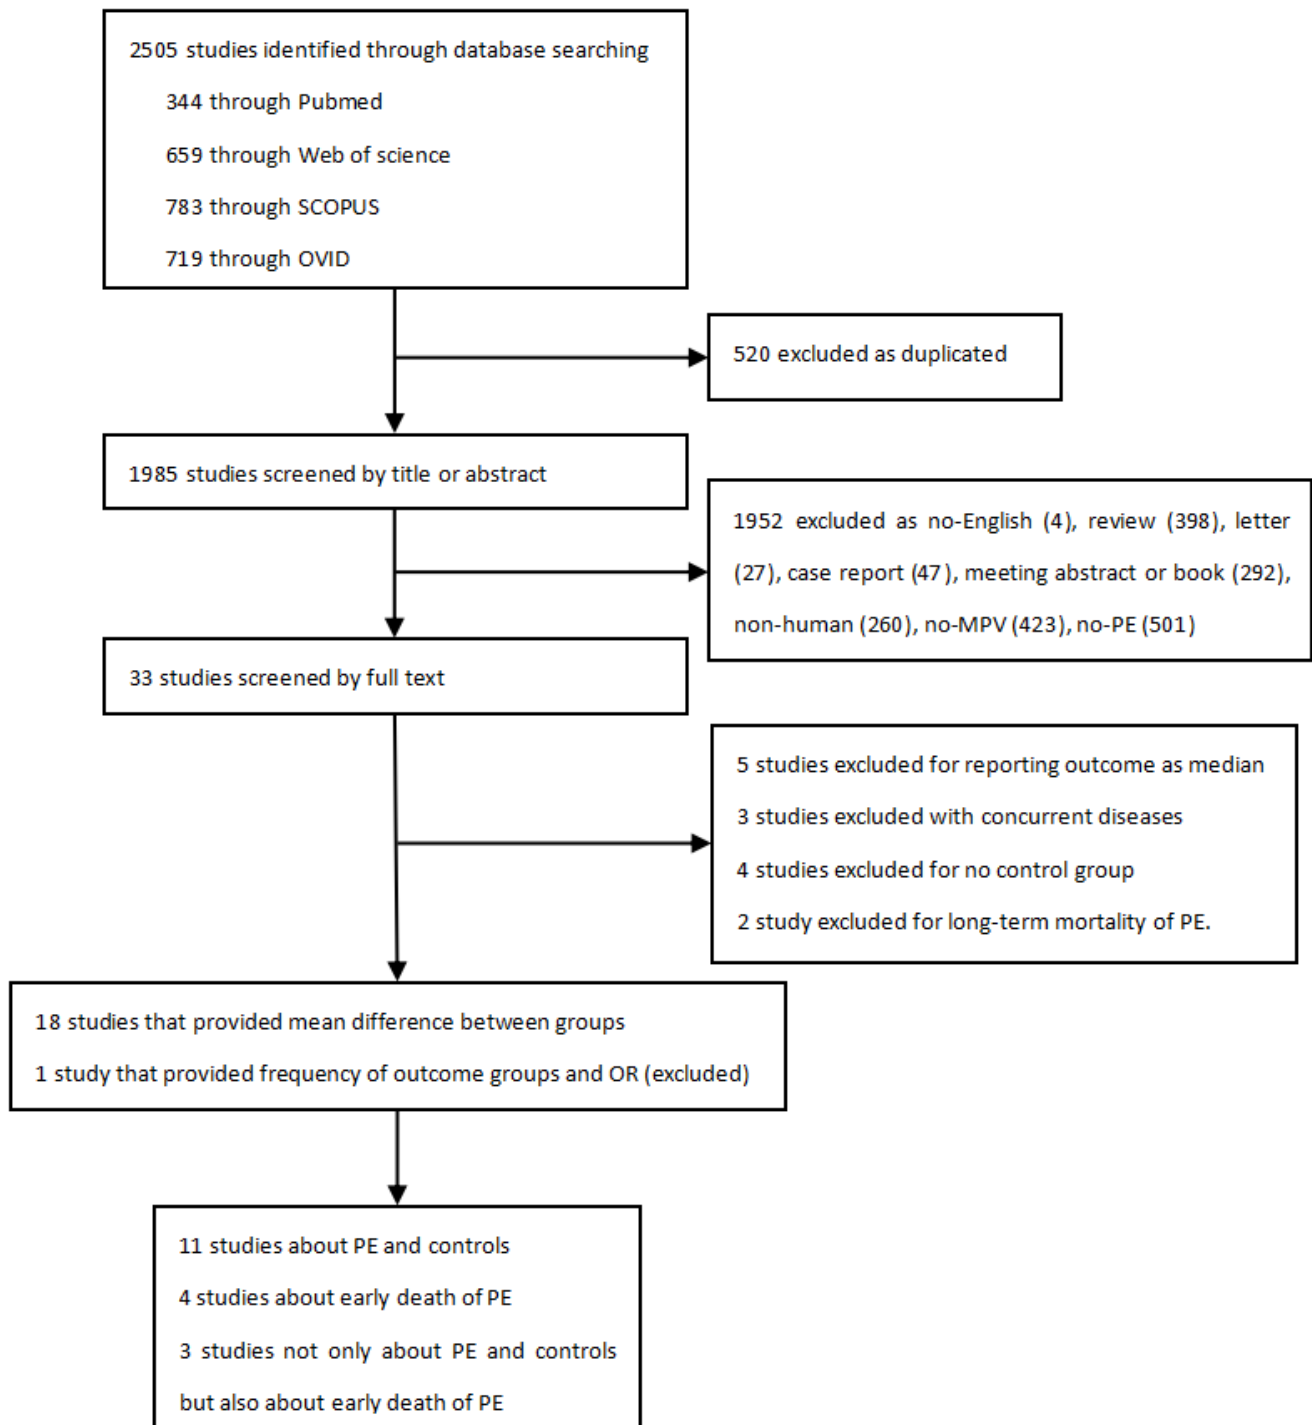

Figure 1. Flow chart of study selection.

**Table 1. Characteristics of included studies.**

| Author                           | Year | Region | Size | Age (year) | Male (%) | EDTA | Testing time | Analyzer | Smoker (%) | Diabetics (%) | Type | NOS |
|----------------------------------|------|--------|------|------------|----------|------|--------------|----------|------------|---------------|------|-----|
| <b>Studies about PE</b>          |      |        |      |            |          |      |              |          |            |               |      |     |
| Sentürk, A.                      | 2017 | Turkey | 480  | 67.7       | 45       | Y    | NA           | Sysmex   | 19         | 9             | N    | 6   |
| Huang, J.                        | 2015 | China  | 145  | 58.5       | 52       | Y    | NA           | Sysmex   | NA         | EX            | N    | 7   |
| Sunnetcioglu, A.                 | 2014 | Turkey | 120  | 57.4       | 44       | Y    | 30min        | Beckman  | NA         | NA            | NA   | 7   |
| Talay, F.                        | 2014 | Turkey | 315  | 51.5       | 59       | Y    | 60min        | Sysmex   | 37         | 16            | S    | 6   |
| Guna, E.                         | 2013 | Turkey | 113  | 57.0       | 59       | Y    | 60min        | Sysmex   | 54         | NA            | NA   | 8   |
| Hilal, E.                        | 2013 | Turkey | 371  | 61.6       | 52       | NA   | NA           | Beckman  | NA         | 18            | NA   | 7   |
| Varol, E.                        | 2011 | Turkey | 177  | 59.4       | 49       | Y    | 30min        | Beckman  | 21         | NA            | S    | 7   |
| Kostrubiec, M.                   | 2010 | Poland | 292  | 64.3       | 40       | Y    | 30min        | Advia    | NA         | NA            | NA   | 6   |
| Sevuk, Utkan                     | 2015 | Turkey | 100  | 39.5       | 51       | Y    | NA           | Sysmex   | 42         | EX            | A    | 7   |
| Icli, Atilla                     | 2015 | Turkey | 196  | 54.6       | 48       | Y    | 120min       | Beckman  | 19         | 8             | A    | 7   |
| In, E.                           | 2015 | Turkey | 187  | 57.5       | 53       | Y    | NA           | Advia    | NA         | NA            | N    | 8   |
| Moharamzadeh, P.                 | 2019 | Iran   | 173  | 60.1       | 50       | NA   | NA           | NA       | NA         | NA            | NA   | 6   |
| Abd, E.                          | 2019 | Egypt  | 70   | 48.6       | 40       | NA   | NA           | NA       | 29         | 16            | S    | 5   |
| Çevik, I.                        | 2014 | Turkey | 128  | 64.7       | NA       | NA   | NA           | Beckman  | NA         | NA            | NA   | 5   |
| <b>Studies about early death</b> |      |        |      |            |          |      |              |          |            |               |      |     |
| In, E.                           | 2015 | Turkey | 108  | 58.1       | 54       | Y    | NA           | Advia    | NA         | NA            | N    | 6   |
| Hilal, E.                        | 2013 | Turkey | 209  | 62.4       | 51       | NA   | NA           | Beckman  | NA         | 18            | NA   | 7   |
| Kostrubiec, M.                   | 2010 | Poland | 192  | 64.0       | 41       | Y    | 30min        | Advia    | NA         | NA            | NA   | 6   |
| Araz, O.                         | 2017 | Turkey | 440  | 61.0       | 46       | Y    | 15min        | Beckman  | NA         | NA            | NA   | 6   |
| Akgullu, C.                      | 2015 | Turkey | 206  | 61.8       | 47       | NA   | NA           | NA       | 43         | 30            | S    | 7   |
| Ertem, A                         | 2016 | Turkey | 264  | 67.6       | 46       | Y    | 60min        | NA       | NA         | NA            | S    | 7   |
| Bozkus, F.                       | 2015 | Turkey | 89   | 59.1       | 55       | Y    | NA           | Cell-dyn | NA         | 13            | NA   | 6   |

Y: blood samples containing EDTA; EX: subjects with diabetics were excluded; A: all PE patients were combined with DVT; S: some PE patients were combined with DVT; N: No PE patients were combined with DVT; NA: not available.

### Relationship between MPV and PE

PE is a pathological condition that recurs frequently and is related to increased death and considerable healthcare costs [2]. Pulmonary thromboembolism (PTE), always along with DVT, is the most common type of PE. Platelet activation is the first step of thrombosis, including size change, adhesion, aggregation, and release of a large number of active factors. MPV is a simple marker of platelet activation. Large-sized platelets are thus more reactive, aggregate more rapidly, lead to reduced bleeding time, and have a higher thrombotic propensity [7–11]. Therefore, MPV might be higher in patients with PE and could be an easy indicator for risk assessment and prediction of early death, which was consistent with the results of our meta-analysis. However, we couldn't demonstrate the utility of MPV in the prediction of PE recurrence, as the study by Araz O, et al. [13] described, for the relevant literature too few to be included. Though uncertain, we thought the hypothesis would be proved in the future.

The pooled results presented heterogeneity to different degrees. The following factors may be sources of heterogeneity: basic features of the study population (age, smoking), disease type (PE with or without DVT),

and publication bias. The relation between age and MPV was controversial, with some studies showing no difference in MPV among different age groups, while others revealing MPV increasing with age [40–43]. The mean age difference between studies might have caused the substantial heterogeneity. The negative effect of age for MPV in our meta-analysis was probably due to other confounding factors or due to false negatives for the small number of studies in the meta-regression analysis. Studies indicated a higher MPV in smokers than in nonsmokers, and smoking cessation has been shown to decrease the value of MPV [44, 45]. In our meta-analysis, the proportion of smokers in each study positively correlated to MPV. Therefore, smoking might be a confounding factor influencing the real association of MPV with PE and may have resulted in the heterogeneity.

Notably, in the study by Ertem AG [35], the MD of MPV between patients with PE and those without PE was higher than that in other studies. In addition, the heterogeneity was considerably lower after removing this study. The most likely reason was that more than half of the patients had DVT as a complication. The study by Kovacs S [12] showed MPV was approximately 0.66 fL higher in patients with DVT than

in controls. Patients with PE along with DVT might present greater MPV than those without DVT. Therefore, studies containing more cases with DVT might have a more significant pooled difference in MPV than those including fewer subjects with DVT, which was in accordance with the results of our subgroup analysis by the disease type. Thus, the study by Ertem AG [35] yielded markedly different results and resulted in heterogeneity.

Additionally, some studies showed that there was no significant difference in MPV between patients and controls among the included studies [3, 25, 26, 31]. This may be due to the different effects of MPV in patients with different levels of risk for PE. Studies by Varol E [28] and Gunay E [22] presented huge differences in MPV of patients with high, medium, and low risks, while studies by Kostrubiec M [26], Hilal E [3], and Ates H [46] showed no differences in MPV. It was unknown whether the differences in MPV between patients with different risk and controls were significant or not. It is

possible that studies including more patients with a high risk presented a larger difference in MPV between patients and controls, while studies including more patients with a low risk exhibited no difference in MPV. However, not all studies conducted risk stratification for patients and described the proportion of patients with different risk levels. Therefore, we thought the inclusion of patients at different risk levels in studies was another source of heterogeneity. Furthermore, not all studies have identified the diagnose of PTE. PTE is only the main part of PE, and there are still PE types that are not PTE. Whether MPV is also related to this part of PE patients is still unknown and need more studies to certificate. This may be another reason for some studies finding no significant difference in MPV between PE patients and controls.

### Strengths and limitations

Compared to the previous meta-analysis by Febra C [15], there are many other strengths in our study. We

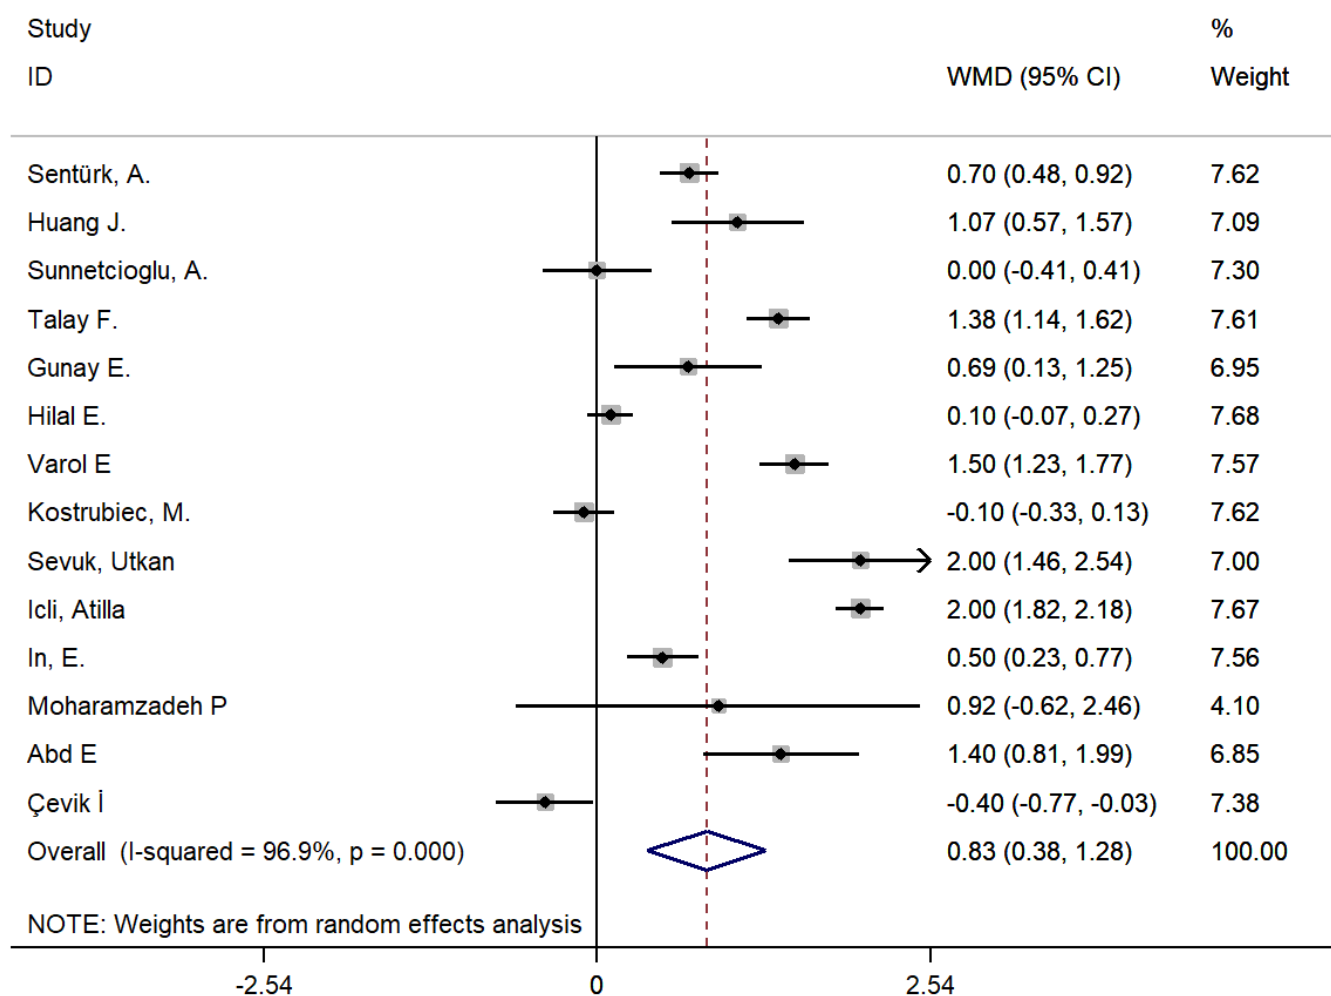

Figure 2. Pooling of weighted mean difference (WMD) for studies about PE.

identified studies by an in-depth search in 4 databases. Two additional study [14, 30] on PE and 4 additional studies [13, 34–36] on early death due to PE were included. The study by Farokhi M [47] on PE was excluded for abstract. We not only described the association between MPV and PE but also assessed the predictive effect of MPV on early death among patients with PE. This study is the first meta-analysis to demonstrate an increased MPV in PE patients with early death. In addition, we explained the sources of heterogeneity in detail according to subgroup, meta-regression, and sensitivity analyses. Furthermore, the two reviewers independently screened the studies

according to the criteria and extracted the data. A total of 18 studies were included in the review, with the number of subjects reaching 2674 cases and 1192 controls.

However, this meta-analysis also has a few limitations. First, all included studies were case-control studies, which could not help assess the predictive or prognostic role of an increased MPV in PE. Second, there were many confounding factors influencing MPV, which were not described or not considered in the included studies. Therefore, sources of high heterogeneity could not be identified completely. It remains uncertain

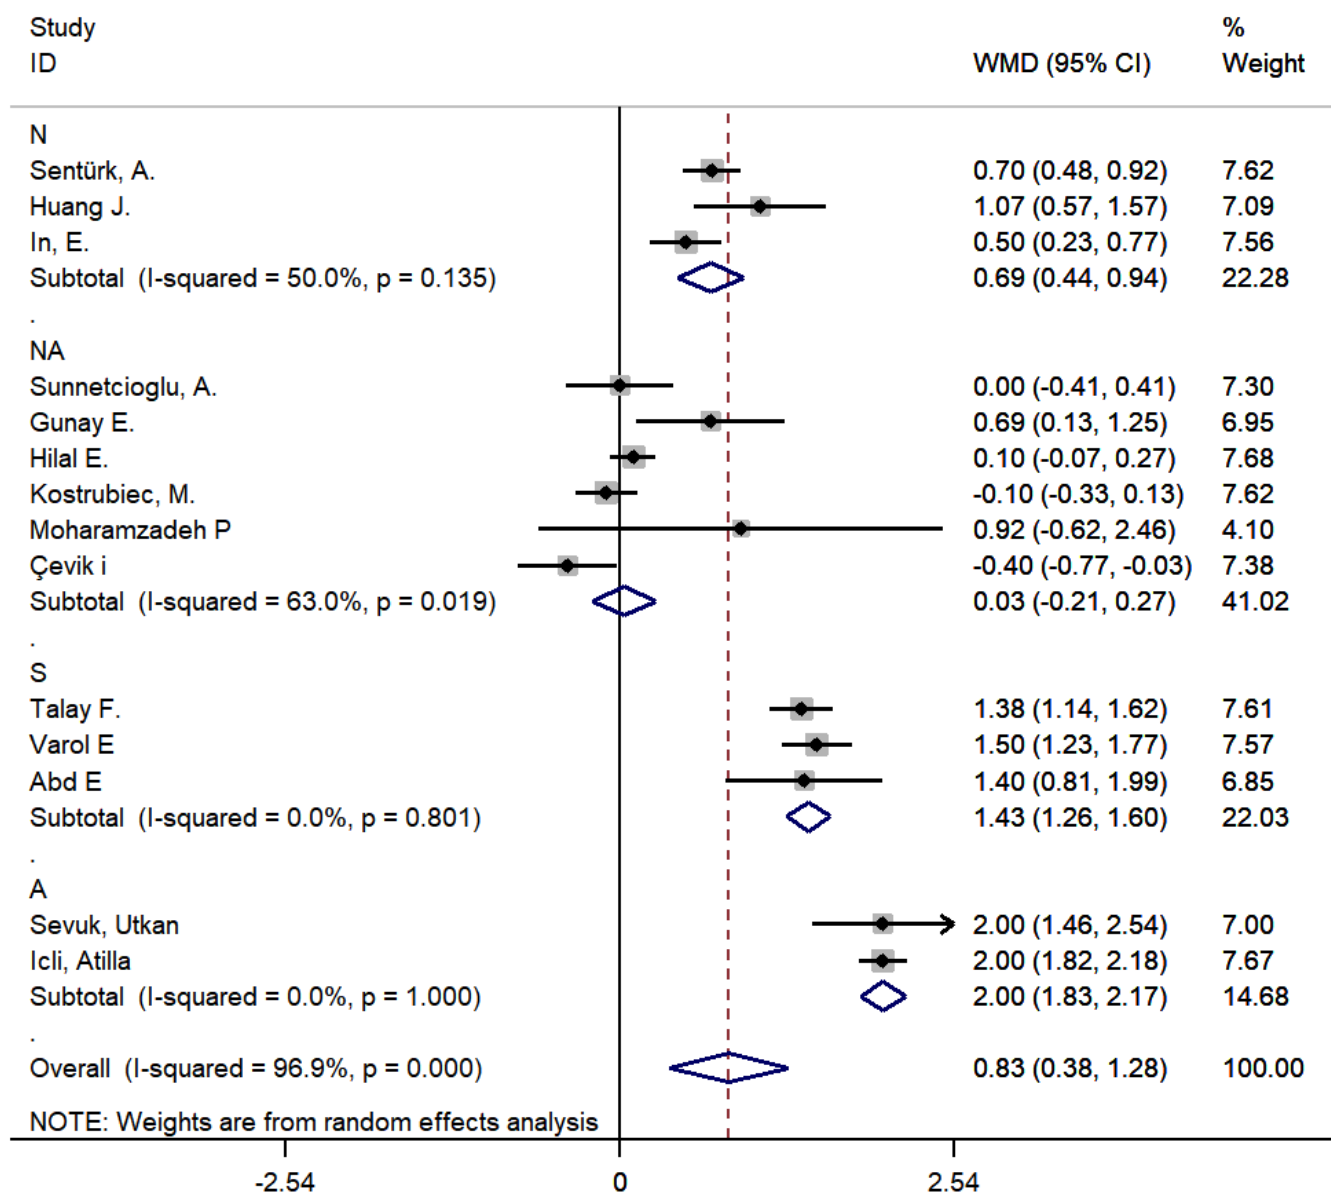

**Figure 3. The subgroup analysis by type of disease for studies about PE.** A: all PE patients were combined with DVT; S: some PE patients were combined with DVT; N: No PE patients were combined with DVT; NA: not available.

whether the role of MPV in PE is direct or indirect through mediation by other factors. Thus, the independent effect of MPV on PE might be overestimated. In addition, further research should be carried out to address the existing publication bias.

### Clinical application and future research

Testing for MPV is cheap and easy in clinical practice. The results of our meta-analysis suggest that MPV is a useful indicator to predict the risk of the occurrence of PE and its related death. But the pooling MPV presented high heterogeneity. Therefore, MPV could be used as a tool to help for the diagnosis and risk score of PE together with many other identified risk factors (Supplementary Table 7). Moreover, MPV could be used for risk stratification of PE and added to the current guidelines [48] to improve the risk estimation accuracy and increase the survival rate. Additionally, MPV could be used as a marker to estimate the effect of treatment, such as anticoagulant and thrombolytic therapies [13, 49, 50].

Further studies should be conducted to support our findings and to examine the clinical utility of MPV testing among patients with PE. Future large-scale cohort studies that include complete information on all known risk factors for VTE should be conducted, and these should consider all confounding factors for MPV, such as age, sex, smoking, diabetes mellitus, EDTA use, type of analyzers used, and testing time. Furthermore, the subjects included in the future studies should be classified by risk stratification to compare the different effects of MPV between patients with different risk levels and controls.

### CONCLUSIONS

There was a positive association between MPV and PE. MPV was significantly larger in patients with PE than in controls and in those who died than in survivors of PE. These findings indicate that MPV could be a useful marker for risk prediction and risk stratification in patients with PE together with other risk indicators.

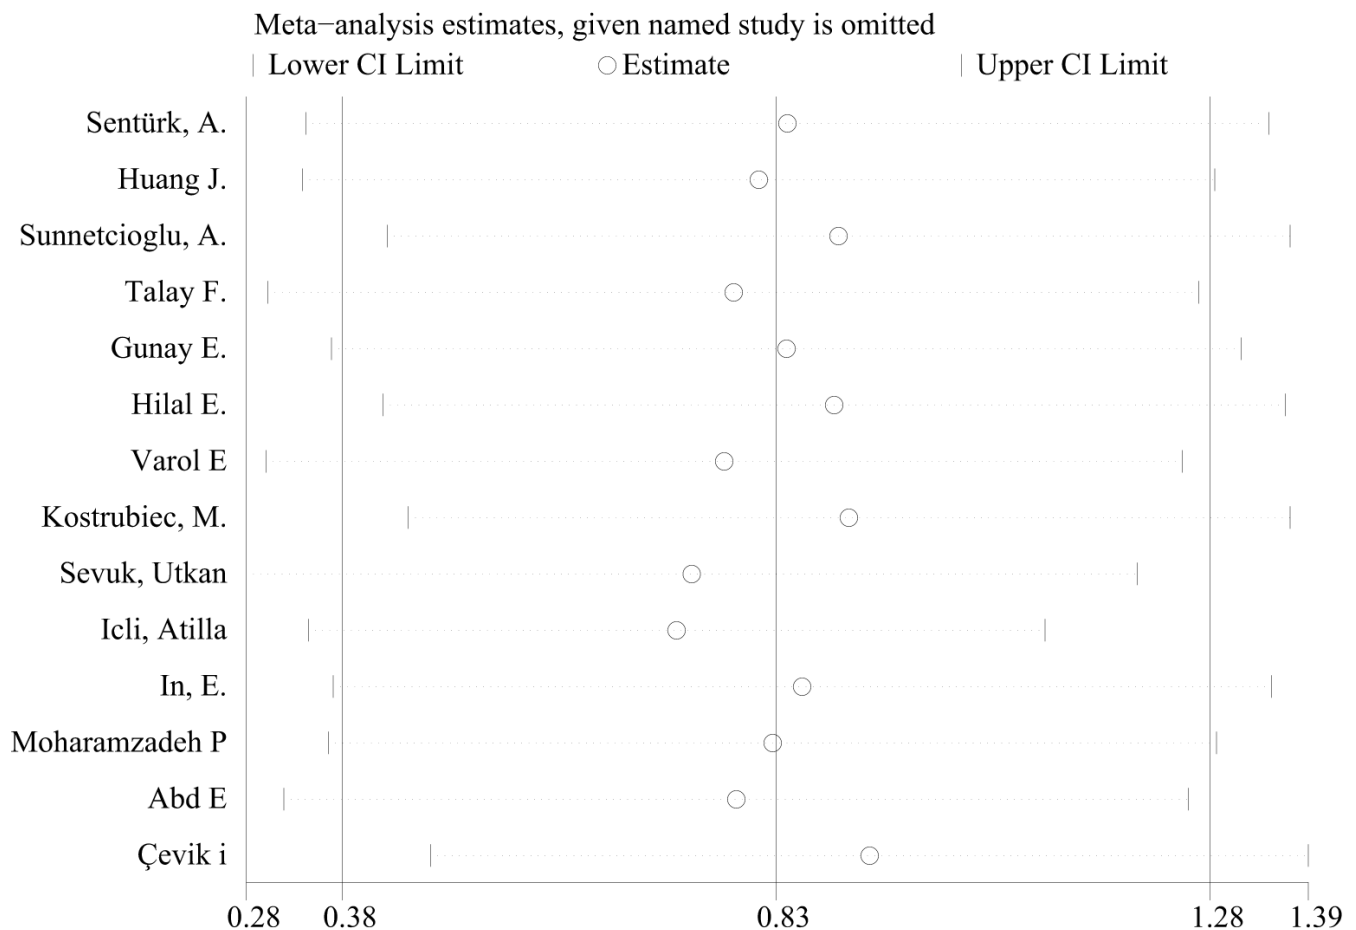

Figure 4. The sensitivity analysis for studies about PE.



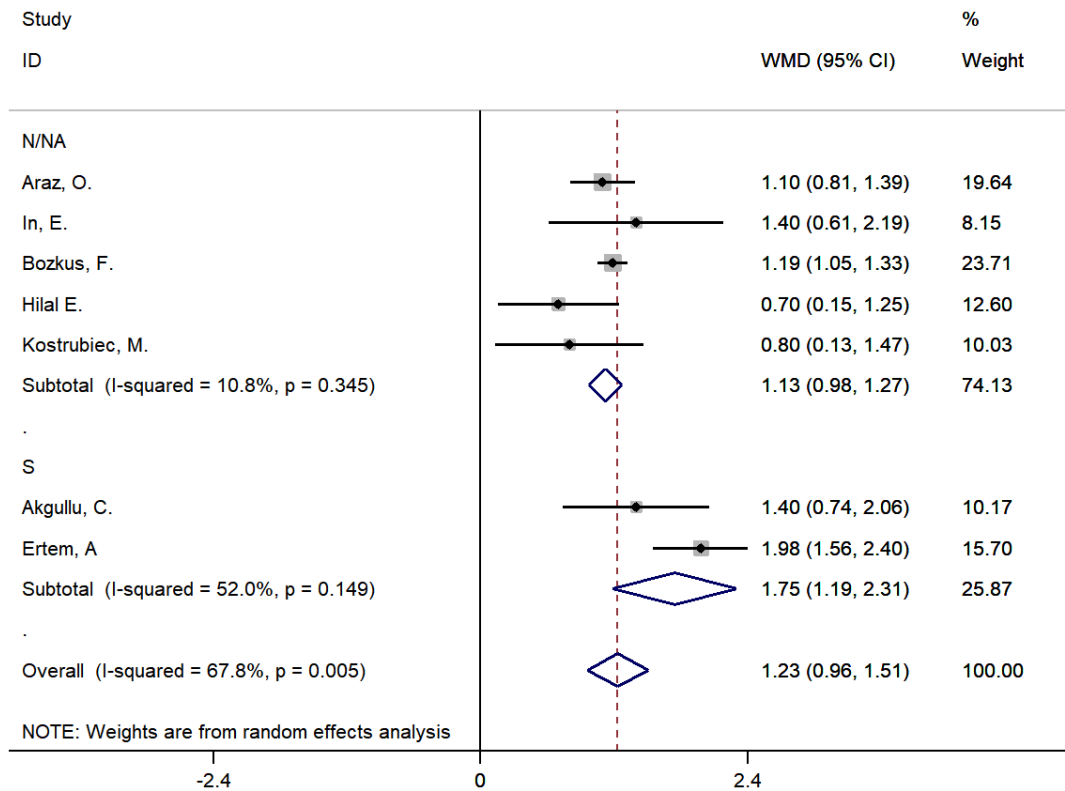

**Figure 5. The subgroup analysis by type of disease for studies about early death of PE.** S: PE patients were combined with DVT; N/NA: No PE patients were combined with DVT or not available.

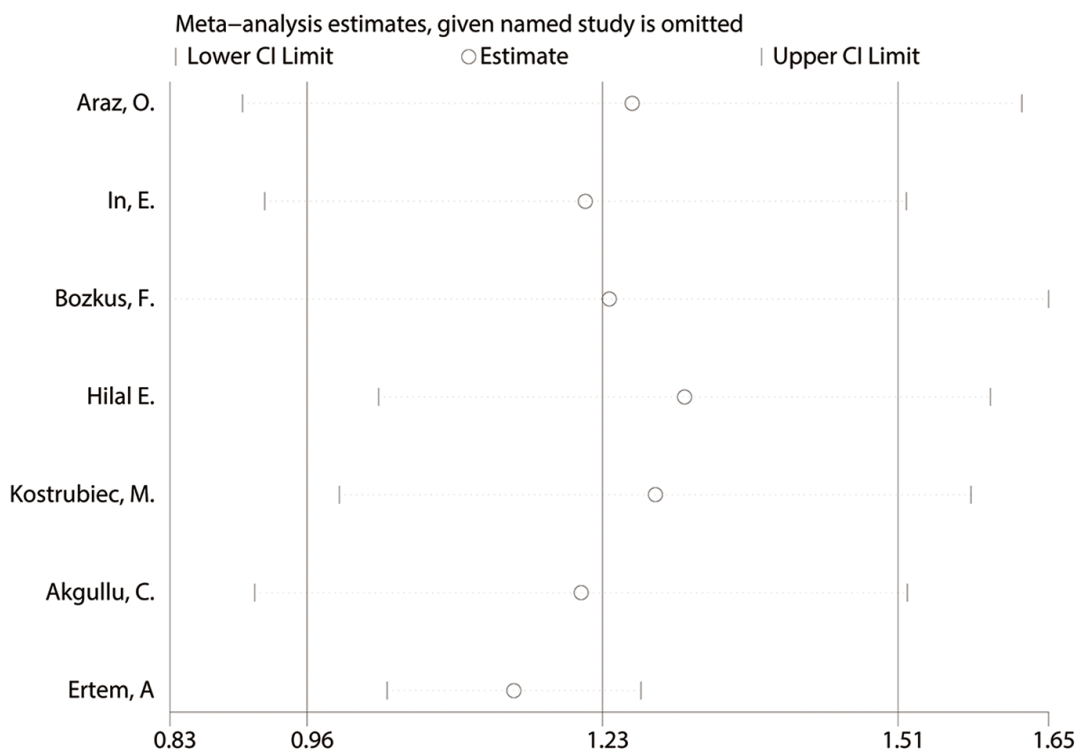

**Figure 6. The sensitivity analysis for studies about early death of PE.**

## Abbreviations

PE: Pulmonary embolism; MPV: Mean platelet volume; CTPA: Computed tomography pulmonary angiography; MRI: Magnetic resonance imaging; MD: Mean difference; SD: Standard deviation; OR: Odds ratios; RR: Risk ratios; HR: Hazard ratios; CI: Confidence intervals; EDTA: Ethylenediaminetetraacetic acid; DVT: Deep vein thrombosis; NOS: Newcastle–Ottawa Scale; WMD: Weighted mean differences; I<sup>2</sup>: I-square; VTE: venous thromboembolism; PTE: Pulmonary thromboembolism.

## AUTHOR CONTRIBUTIONS

W.-Y.L. and Y.W. designed the study. X.L. collected the data and did the analysis. W.-Y.L. and Y.W. prepared the figures and tables, and drafted the manuscript. X.L. revised the manuscript, including figures and tables. Y.H. supervised the study. All authors reviewed the manuscript.

## CONFLICTS OF INTEREST

The authors declare that they have no conflicts of interest.

## FUNDING

This study was supported by National Natural Science Foundation of China (Grants: 81500109, 81601540).

## REFERENCES

1. Prabhu W, Soukas PA. Pulmonary Embolism in 2017: Increasing Options for Increasing Incidence. *R I Med J* (2013). 2017; 100:27–32. PMID:[28459918](#)
2. Yamamoto T. Management of patients with high-risk pulmonary embolism: a narrative review. *J Intensive Care*. 2018; 6:16. <https://doi.org/10.1186/s40560-018-0286-8> PMID:[29511564](#)
3. Hilal E, Neslihan Y, Gazi G, Sinan T, Zeynep Ayfer A. Does the mean platelet volume have any importance in patients with acute pulmonary embolism? *Wien Klin Wochenschr*. 2013; 125:381–85. <https://doi.org/10.1007/s00508-013-0380-9> PMID:[23807041](#)
4. Andresen MS, Sandven I, Brunborg C, Njaastad AM, Strekerud F, Abdelnoor M, Smith P, Abildgaard U. Mortality and recurrence after treatment of VTE: long term follow-up of patients with good life-expectancy. *Thromb Res*. 2011; 127:540–46. <https://doi.org/10.1016/j.thromres.2011.02.017> PMID:[21435698](#)
5. Janata K, Holzer M, Domanovits H, Müllner M, Bankier A, Kurtaran A, Bankl HC, Laggner AN. Mortality of patients with pulmonary embolism. *Wien Klin Wochenschr*. 2002; 114:766–72. PMID:[12416281](#)
6. Park Y, Schoene N, Harris W. Mean platelet volume as an indicator of platelet activation: methodological issues. *Platelets*. 2002; 13:301–06. <https://doi.org/10.1080/095371002220148332> PMID:[12189016](#)
7. Bath PM, Butterworth RJ. Platelet size: measurement, physiology and vascular disease. *Blood Coagul Fibrinolysis*. 1996; 7:157–61. <https://doi.org/10.1097/00001721-199603000-00011> PMID:[8735807](#)
8. Jakubowski JA, Adler B, Thompson CB, Valeri CR, Deykin D. Influence of platelet volume on the ability of prostacyclin to inhibit platelet aggregation and the release reaction. *J Lab Clin Med*. 1985; 105:271–76. PMID:[3882862](#)
9. Thompson CB, Jakubowski JA, Quinn PG, Deykin D, Valeri CR. Platelet size as a determinant of platelet function. *J Lab Clin Med*. 1983; 101:205–13. PMID:[6822760](#)
10. Colkesen Y, Muderrisoglu H. The role of mean platelet volume in predicting thrombotic events. *Clin Chem Lab Med*. 2012; 50:631–34. <https://doi.org/10.1515/CCLM.2011.806> PMID:[22112054](#)
11. Martin JF, Trowbridge EA, Salmon G, Plumb J. The biological significance of platelet volume: its relationship to bleeding time, platelet thromboxane B2 production and megakaryocyte nuclear DNA concentration. *Thromb Res*. 1983; 32:443–60. [https://doi.org/10.1016/0049-3848\(83\)90255-4](https://doi.org/10.1016/0049-3848(83)90255-4) PMID:[6658722](#)
12. Kovács S, Csiki Z, Zsóri KS, Bereczky Z, Shemirani AH. Characteristics of platelet count and size and diagnostic accuracy of mean platelet volume in patients with venous thromboembolism. A systematic review and meta-analysis. *Platelets*. 2019; 30:139–47. <https://doi.org/10.1080/09537104.2017.1414175> PMID:[29252063](#)
13. Araz O, Albez FS, Ucar EY, Kerget B, Yılmaz N, Akgun M. Predictive Value of Mean Platelet Volume for Pulmonary Embolism Recurrence. *Lung*. 2017; 195:497–502. <https://doi.org/10.1007/s00408-017-0020-7> PMID:[28620755](#)
14. Senturk A, Kanbay A, Erdogan S, Kilic H, Ogut T, Hezer H, Hasanoglu HC. Mean Platelet Volume: A Simple Tool

- For Early Risk Stratification Of Pulmonary Embolism. *East J Med*. 2017; 22:34–38.  
<https://doi.org/10.5505/ejm.2017.43534>
15. Febra C, Macedo A. Diagnostic Role of Mean-Platelet Volume in Acute Pulmonary Embolism: A Meta-analysis and Systematic Review. *Clin Med Insights Circ Respir Pulm Med*. 2020; 14:1179548420956365.  
<https://doi.org/10.1177/1179548420956365>  
PMID:[33100832](https://pubmed.ncbi.nlm.nih.gov/33100832/)
  16. Moher D, Liberati A, Tetzlaff J, Altman DG, and PRISMA Group. Preferred reporting items for systematic reviews and meta-analyses: the PRISMA statement. *Int J Surg*. 2010; 8:336–41.  
<https://doi.org/10.1016/j.ijsu.2010.02.007>  
PMID:[20171303](https://pubmed.ncbi.nlm.nih.gov/20171303/)
  17. Stang A. Critical evaluation of the Newcastle-Ottawa scale for the assessment of the quality of nonrandomized studies in meta-analyses. *Eur J Epidemiol*. 2010; 25:603–05.  
<https://doi.org/10.1007/s10654-010-9491-z>  
PMID:[20652370](https://pubmed.ncbi.nlm.nih.gov/20652370/)
  18. DerSimonian R, Kacker R. Random-effects model for meta-analysis of clinical trials: an update. *Contemp Clin Trials*. 2007; 28:105–14.  
<https://doi.org/10.1016/j.cct.2006.04.004>  
PMID:[16807131](https://pubmed.ncbi.nlm.nih.gov/16807131/)
  19. Higgins JP, Thompson SG, Deeks JJ, Altman DG. Measuring inconsistency in meta-analyses. *BMJ*. 2003; 327:557–60.  
<https://doi.org/10.1136/bmj.327.7414.557>  
PMID:[12958120](https://pubmed.ncbi.nlm.nih.gov/12958120/)
  20. Egger M, Davey Smith G, Schneider M, Minder C. Bias in meta-analysis detected by a simple, graphical test. *BMJ*. 1997; 315:629–34.  
<https://doi.org/10.1136/bmj.315.7109.629>  
PMID:[9310563](https://pubmed.ncbi.nlm.nih.gov/9310563/)
  21. Begg CB, Mazumdar M. Operating characteristics of a rank correlation test for publication bias. *Biometrics*. 1994; 50:1088–101.  
<https://doi.org/10.2307/2533446> PMID:[7786990](https://pubmed.ncbi.nlm.nih.gov/7786990/)
  22. Günay E, Sarinc Ulasli S, Kacar E, Halici B, Unlu E, Tünay K, Ozkececi G, Koken T, Unlu M. Can platelet indices predict obstruction level of pulmonary vascular bed in patients with acute pulmonary embolism? *Clin Respir J*. 2014; 8:33–40.  
<https://doi.org/10.1111/crj.12031>  
PMID:[23711164](https://pubmed.ncbi.nlm.nih.gov/23711164/)
  23. Huang J, Chen Y, Cai Z, Chen P. Diagnostic value of platelet indexes for pulmonary embolism. *Am J Emerg Med*. 2015; 33:760–63.  
<https://doi.org/10.1016/j.ajem.2015.02.043>  
PMID:[25907501](https://pubmed.ncbi.nlm.nih.gov/25907501/)
  24. İn E, Deveci F, Kaman D, Ozdemir C, Sökücü S, Kuluozturk M, Dagli M. The importance of mean platelet volume and red cell distribution width in acute pulmonary embolism. *Acta Med Mediter*. 2015; 31:1209–16.
  25. Sunnetcioglu A, Karadas S. Mean platelet volume as an indicator of disease in patients with acute pulmonary embolisms. *East J Med*. 2014; 19:107–11.
  26. Kostrubiec M, Łabyk A, Pedowska-Włoszek J, Hryniewicz-Szymańska A, Pacho S, Jankowski K, Lichodziejewska B, Pruszczyk P. Mean platelet volume predicts early death in acute pulmonary embolism. *Heart*. 2010; 96:460–65.  
<https://doi.org/10.1136/hrt.2009.180489>  
PMID:[19910287](https://pubmed.ncbi.nlm.nih.gov/19910287/)
  27. Talay F, Ocak T, Alcelik A, Erkuran K, Akkaya A, Duran A, Demirhan A, Kar Kurt O, Asuk Z. A new diagnostic marker for acute pulmonary embolism in emergency department: mean platelet volume. *Afr Health Sci*. 2014; 14:94–99.  
<https://doi.org/10.4314/ahs.v14i1.15>  
PMID:[26060464](https://pubmed.ncbi.nlm.nih.gov/26060464/)
  28. Varol E, Icli A, Uysal BA, Ozaydin M. Platelet indices in patients with acute pulmonary embolism. *Scand J Clin Lab Invest*. 2011; 71:163–67.  
<https://doi.org/10.3109/00365513.2010.547596>  
PMID:[21208032](https://pubmed.ncbi.nlm.nih.gov/21208032/)
  29. Icli A, Aksoy F, Turker Y, Uysal BA, Alpay MF, Dogan A, Nar G, Varol E. Relationship Between Mean Platelet Volume and Pulmonary Embolism in Patients With Deep Vein Thrombosis. *Heart Lung Circ*. 2015; 24:1081–86.  
<https://doi.org/10.1016/j.hlc.2015.04.170>  
PMID:[26146200](https://pubmed.ncbi.nlm.nih.gov/26146200/)
  30. Sevuk U, Bahadir MV, Altindag R, Baysal E, Yaylak B, Ay N, Ayaz F, Demirtas E. Value of serial platelet indices measurements for the prediction of pulmonary embolism in patients with deep venous thrombosis. *Ther Clin Risk Manag*. 2015; 11:1243–49.  
<https://doi.org/10.2147/TCRM.S89355>  
PMID:[26316769](https://pubmed.ncbi.nlm.nih.gov/26316769/)
  31. Moharamzadeh P, Rahmani F, Foroughifar S, Shahsavarinia K. Reliability of Platelet Indices for Diagnosing Pulmonary Embolism; a Brief Report. *Adv J Emerg Med*. 2019; 3:e27.  
PMID:[31410404](https://pubmed.ncbi.nlm.nih.gov/31410404/)
  32. Abd E, El-Ghany E, Abdelaziz A, Abd R, El-Fatah E, Magdy M, Abdelaziz M, Elghany H, Othman A, Mohammad M. Role of hemogram parameters in diagnosis and assessing severity of pulmonary embolism. *Egypt J Chest Dis Tuberc*. 2019; 68: 194–202.

33. Çevik İ, Narıcı H, DüNDAR G, Ayrik C, Babuş S. Is there a diagnostic value for the platelet indices patients in pulmonary embolism? *Hong Kong J Emerg Med.* 2018; 25:12810100.  
<https://doi.org/10.1177/1024907917743489>
34. Bozkus F, Bilal B, Aktas Samur A, Çetinkaya A. Prognostic value of mean platelet volume and neutrophil/lymphocyte ratio in patients with pulmonary embolism. *Acta Med Mediter.* 2015; 3:109–14.
35. Ertem AG, Yayla C, Acar B, Kirbas O, Unal S, Uzel Sener M, Akboga MK, Efe TH, Sivri S, Sen F, Gokaslan S, Topaloglu S. Relation between lymphocyte to monocyte ratio and short-term mortality in patients with acute pulmonary embolism. *Clin Respir J.* 2018; 12:580–86.  
<https://doi.org/10.1111/crj.12565> PMID:27727508
36. Akgüllü Ç, Ömürlü İK, Eryılmaz U, Avcil M, Dağtekin E, Akdeniz M, Güngör H, Zencir C. Predictors of early death in patients with acute pulmonary embolism. *Am J Emerg Med.* 2015; 33:214–21.  
<https://doi.org/10.1016/j.ajem.2014.11.022>  
PMID:25499176
37. Sansanayudh N, Numthavaj P, Muntham D, Yamwong S, McEvoy M, Attia J, Sritara P, Thakkinstian A. Prognostic effect of mean platelet volume in patients with coronary artery disease. A systematic review and meta-analysis. *Thromb Haemost.* 2015; 114:1299–309.  
<https://doi.org/10.1160/TH15-04-0280>  
PMID:26245769
38. Sansanayudh N, Anothaisintawee T, Muntham D, McEvoy M, Attia J, Thakkinstian A. Mean platelet volume and coronary artery disease: a systematic review and meta-analysis. *Int J Cardiol.* 2014; 175: 433–40.  
<https://doi.org/10.1016/j.ijcard.2014.06.028>  
PMID:25017904
39. Lippi G, Mattiuzzi C, Comelli I, Cervellin G. Mean platelet volume in patients with ischemic heart disease: meta-analysis of diagnostic studies. *Blood Coagul Fibrinolysis.* 2013; 24:216–19.  
<https://doi.org/10.1097/MBC.0b013e32835b2450>  
PMID:23147473
40. Santimone I, Di Castelnuovo A, De Curtis A, Spinelli M, Cugino D, Gianfagna F, Zito F, Donati MB, Cerletti C, de Gaetano G, Iacoviello L, and MOLI-SANI Project Investigators. White blood cell count, sex and age are major determinants of heterogeneity of platelet indices in an adult general population: results from the MOLI-SANI project. *Haematologica.* 2011; 96:1180–88.  
<https://doi.org/10.3324/haematol.2011.043042>  
PMID:21546503
41. Demirin H, Ozhan H, Ucgun T, Celer A, Bulur S, Cil H, Gunes C, Yildirim HA. Normal range of mean platelet volume in healthy subjects: Insight from a large epidemiologic study. *Thromb Res.* 2011; 128: 358–60.  
<https://doi.org/10.1016/j.thromres.2011.05.007>  
PMID:21620440
42. Lippi G, Meschi T, Borghi L. Mean platelet volume increases with aging in a large population study. *Thromb Res.* 2012; 129:e159–60.  
<https://doi.org/10.1016/j.thromres.2011.12.031>  
PMID:22261476
43. Verdoia M, Schaffer A, Barbieri L, Bellomo G, Marino P, Sinigaglia F, Suryapranata H, De Luca G, and Novara Atherosclerosis Study (NAS) group. Impact of age on mean platelet volume and its relationship with coronary artery disease: a single-centre cohort study. *Exp Gerontol.* 2015; 62:32–36.  
<https://doi.org/10.1016/j.exger.2014.12.019>  
PMID:25562813
44. Kario K, Matsuo T, Nakao K. Cigarette smoking increases the mean platelet volume in elderly patients with risk factors for atherosclerosis. *Clin Lab Haematol.* 1992; 14:281–87.  
<https://doi.org/10.1111/j.1365-2257.1992.tb00103.x>  
PMID:1478007
45. Cho SY, You E, Lee HJ, Lee WI, Park TS. Smoking cessation decreases mean platelet volume in healthy Korean populations. *Clin Lab.* 2014; 60:1413–16.  
<https://doi.org/10.7754/clin.lab.2013.130901>  
PMID:25185431
46. Ates H, Ates I, Kundi H, Yilmaz FM. Diagnostic validity of hematologic parameters in evaluation of massive pulmonary embolism. *J Clin Lab Anal.* 2017; 31:e22072.  
<https://doi.org/10.1002/jcla.22072>  
PMID:27709684
47. Farokhi M, Seashore J, Epelbaum O. Complete blood count parameters in hospitalized patients with suspected pulmonary embolism. *Am J Respir Crit Care Med.* 2015; 191:A4890.
48. Torbicki A, Perrier A, Konstantinides S, Agnelli G, Galiè N, Pruszczyk P, Bengel F, Brady AJ, Ferreira D, Janssens U, Klepetko W, Mayer E, Remy-Jardin M, et al, and ESC Committee for Practice Guidelines (CPG). Guidelines on the diagnosis and management of acute pulmonary embolism: the Task Force for the Diagnosis and Management of Acute Pulmonary Embolism of the European Society of Cardiology (ESC). *Eur Heart J.* 2008; 29:2276–315.  
<https://doi.org/10.1093/eurheartj/ehn310>  
PMID:18757870

49. Taş Gülen Ş, Yazıcı O, Omurlu I. The Prognostic Value of Hematological Parameters in Patients with Pulmonary Embolism. *Journal of Clinical and Analytical Medicine*. 2017; 8:207–10.
50. Sevak U, Altindag R, Bahadir MV, Ay N, Demirtas E, Ayaz F. Value of platelet indices in identifying complete

resolution of thrombus in deep venous thrombosis patients. *Indian J Hematol Blood Transfus*. 2015; 31:71–76.  
<https://doi.org/10.1007/s12288-014-0365-5>  
PMID:[25548449](https://pubmed.ncbi.nlm.nih.gov/25548449/)

SUPPLEMENTARY MATERIALS

Supplementary Figures

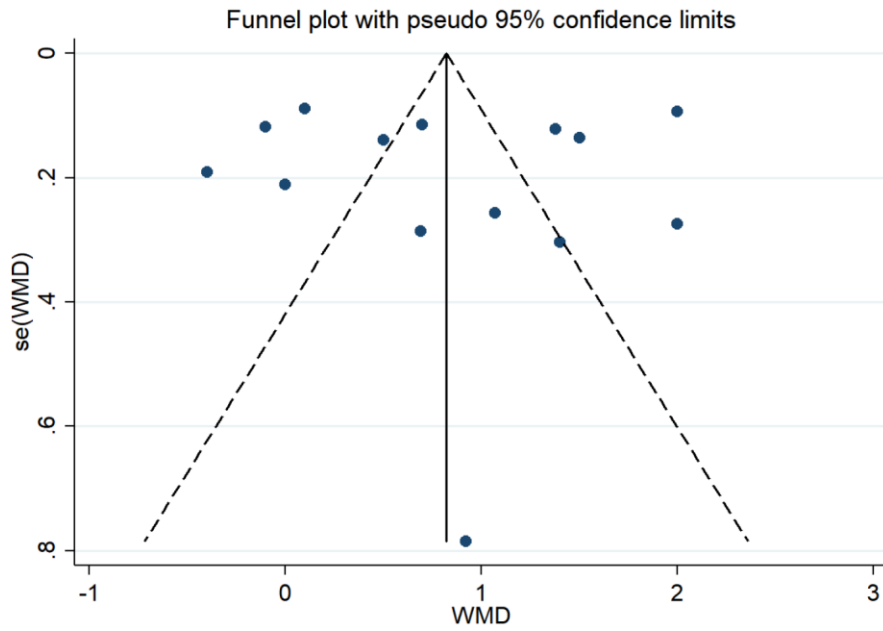

Supplementary Figure 1. The funnel plot of studies of PE.

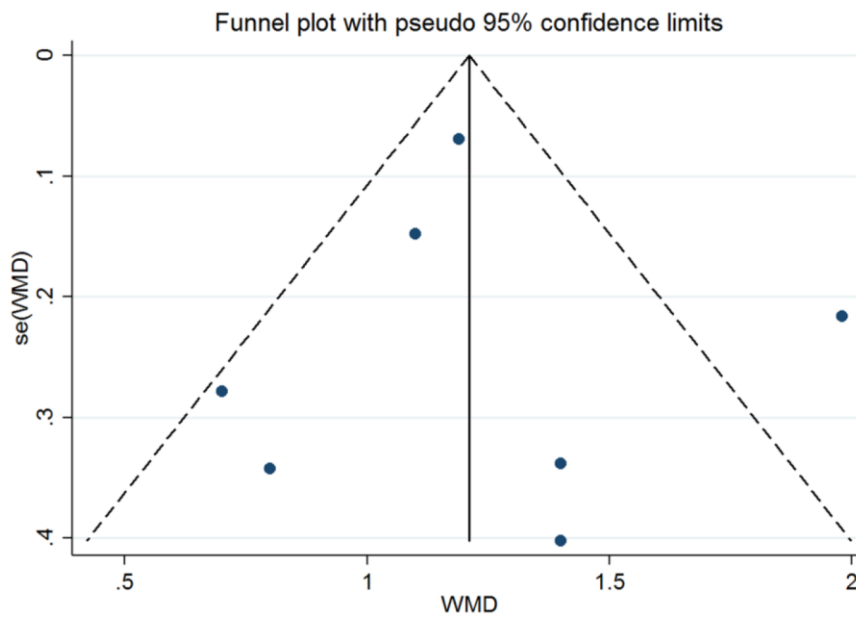

Supplementary Figure 2. The funnel plot of studies of early death of PE.

## Supplementary Tables

**Supplementary Table 1. Data of MPV (fL) for each study about PE.**

| <b>Author</b>    | <b>year</b> | <b>ne</b> | <b>emean</b> | <b>esd</b> | <b>nc</b> | <b>cmean</b> | <b>csd</b> |
|------------------|-------------|-----------|--------------|------------|-----------|--------------|------------|
| Sentürk, A.      | 2017        | 325       | 9.8          | 1.7        | 155       | 9.1          | 0.8        |
| Huang, J.        | 2015        | 70        | 9.91         | 1.4        | 75        | 8.84         | 1.68       |
| Sunnetcioglu, A. | 2014        | 67        | 8.4          | 1.2        | 53        | 8.4          | 1.1        |
| Talay, F.        | 2014        | 150       | 9.42         | 1.22       | 165       | 8.04         | 0.89       |
| Gunay, E.        | 2014        | 63        | 10.92        | 1.37       | 50        | 10.23        | 1.61       |
| Hilal, E.        | 2013        | 209       | 8            | 1.1        | 162       | 7.9          | 0.59       |
| Varol, E.        | 2011        | 107       | 9.6          | 1          | 70        | 8.1          | 0.8        |
| Kostrubiec, M.   | 2010        | 192       | 10           | 1.2        | 100       | 10.1         | 0.8        |
| In, E.           | 2015        | 108       | 8.9          | 1.1        | 79        | 8.4          | 0.8        |
| Sevuk, Utkan     | 2015        | 50        | 10           | 1.6        | 50        | 8            | 1.1        |
| Icli, Atilla     | 2015        | 98        | 9.9          | 0.6        | 98        | 7.9          | 0.7        |
| Moharamzadeh, P. | 2019        | 125       | 10.38        | 8.59       | 48        | 9.46         | 1.11       |
| Abd, E.          | 2019        | 50        | 8.9          | 1          | 20        | 7.5          | 1.2        |
| Çevik, I.        | 2014        | 61        | 9.73         | 1.19       | 67        | 10.13        | 0.94       |

ne/nc: the number of subjects in case or control group.

emean/cmean: the mean value of MPV in case or control group.

esd/csd: the standard deviation of MPV in case or control group.

**Supplementary Table 2. The subgroup analysis for studies about PE.**

| PE              | No. of studies | WMD (95%CI)       | Heterogeneity  |         |
|-----------------|----------------|-------------------|----------------|---------|
|                 |                |                   | I <sup>2</sup> | P-value |
| Region          |                |                   |                |         |
| W               | 11             | 0.76 (0.25-1.27)  | 97.6%          | <0.001  |
| NW              | 3              | 1.19 (0.82,1.56)  | 0.0%           | 0.665   |
| Testing time    |                |                   |                |         |
| ≤2h             | 6              | 0.92 (0.16-1.68)  | 97.9%          | <0.001  |
| NA              | 8              | 0.74 (0.29-1.18)  | 92.0%          | <0.001  |
| Analyzer        |                |                   |                |         |
| Sysmex          | 5              | 1.16 (0.71-1.60)  | 86.8%          | <0.001  |
| Beckman         | 5              | 0.65 (-0.33-1.62) | 98.7%          | <0.001  |
| Advia           | 2              | 0.20 (-0.39-0.78) | 90.8%          | 0.001   |
| NA              | 2              | 1.34 (0.78-1.89)  | 0.0%           | 0.568   |
| Smoker          |                |                   |                |         |
| Y               | 7              | 1.39 (0.95-1.82)  | 93.3%          | <0.001  |
| NA              | 7              | 0.19 (-0.11-0.49) | 82.1%          | <0.001  |
| Diabetics       |                |                   |                |         |
| Y               | 5              | 1.11 (0.32-1.90)  | 98.3%          | <0.001  |
| EX              | 2              | 1.53 (0.62-2.44)  | 83.7%          | 0.013   |
| NA              | 7              | 0.41 (-0.17-0.98) | 94.4%          | <0.001  |
| Type of disease |                |                   |                |         |
| S               | 3              | 1.43 (1.26-1.60)  | 0.0%           | 0.801   |
| N               | 3              | 0.69 (0.44-0.94)  | 50.0%          | 0.135   |
| NA              | 6              | 0.03 (-0.21-0.28) | 63.0%          | 0.019   |
| A               | 2              | 2.00 (1.83-2.17)  | 0.00%          | 1.000   |
| NOS             |                |                   |                |         |
| 5               | 2              | 0.49 (-1.28-2.25) | 96.0%          | <0.001  |
| 6               | 4              | 0.69 (-0.06-1.45) | 96.1%          | <0.001  |
| 7               | 6              | 1.11 (0.28-1.94)  | 98.1%          | <0.001  |
| 8               | 2              | 0.54 (0.29-0.78)  | 0.0%           | 0.55    |

W/NW: white or non-white country; Y: subjects contain smokers (or diabetics); EX: subjects with diabetics were excluded; A: all PE patients were combined with DVT; S: some PE patients were combined with DVT; N: No PE patients were combined with DVT; NA: not available.



**Supplementary Table 3. The sensitivity analysis for studies about PE: by deleting one of the studies and then analyzing the pooling effect and heterogeneity of the remaining papers.**

| Author           | No. of subjects | WMD (95%CI)      | Heterogeneity  |         |
|------------------|-----------------|------------------|----------------|---------|
|                  |                 |                  | I <sup>2</sup> | P-value |
| Sentürk, A.      | 2387            | 0.84 (0.34-1.35) | 97.1%          | <0.001  |
| Huang, J.        | 2722            | 0.81 (0.34-1.29) | 97.1%          | <0.001  |
| Sunnetcioglu, A. | 2747            | 0.90 (0.42-1.37) | 97.0%          | <0.001  |
| Talay, F.        | 2552            | 0.79 (0.30-1.27) | 97.0%          | <0.001  |
| Gunay, E.        | 2754            | 0.84 (0.37-1.32) | 97.1%          | <0.001  |
| Hilal, E.        | 2496            | 0.89 (0.41-1.36) | 96.5%          | <0.001  |
| Varol, E.        | 2690            | 0.78 (0.30-1.26) | 96.9%          | <0.001  |
| Kostrubiec, M.   | 2575            | 0.91 (0.45-1.37) | 96.6%          | <0.001  |
| Sevuk, Utkan     | 2767            | 0.74 (0.28-1.21) | 97.0%          | <0.001  |
| Icli, Atilla     | 2680            | 0.73 (0.34-1.11) | 94.7%          | <0.001  |
| In, E.           | 2671            | 0.86 (0.37-1.35) | 97.1%          | <0.001  |
| Moharamzadeh, P. | 2694            | 0.83 (0.36-1.29) | 97.1%          | <0.001  |
| Abd, E.          | 2797            | 0.79 (0.32-1.26) | 97.1%          | <0.001  |
| Çevik, I.        | 2739            | 0.93 (0.47-1.39) | 96.8%          | <0.001  |

**Supplementary Table 4. Data of MPV (fL) for each study about early death of PE.**

| Author         | year | ne | emean | esd  | nc   | cmean | csd  |
|----------------|------|----|-------|------|------|-------|------|
| Araz, O.       | 2017 | 73 | 8.8   | 1.2  | 367  | 7.7   | 0.9  |
| In, E.         | 2015 | 11 | 10.2  | 1.3  | 97   | 8.8   | 0.9  |
| Bozkus, F.     | 2015 | 11 | 8.78  | 0.19 | 78   | 7.59  | 0.35 |
| Hilal, E.      | 2013 | 17 | 8.6   | 1.1  | 192  | 7.9   | 1.1  |
| Kostrubiec, M. | 2010 | 18 | 10.7  | 1.4  | 174  | 9.9   | 1.2  |
| Akgullu, C.    | 2015 | 30 | 10.2  | 1.81 | 1.76 | 8.8   | 0.96 |
| Ertem, A       | 2016 | 34 | 10.64 | 1.14 | 230  | 8.66  | 1.41 |

ne/nc: the number of subjects in death or survivor group.

emean/cmean: the mean value of MPV in death or survivor group.

esd/csd: the standard deviation of MPV in death or survivor group.

**Supplementary Table 5. The subgroup analysis for studies about early death of PE.**

| Early death     | No. of studies | WMD (95%CI)      | Heterogeneity  |         |
|-----------------|----------------|------------------|----------------|---------|
|                 |                |                  | I <sup>2</sup> | P-value |
| Testing time    |                |                  |                |         |
| ≤2h             | 3              | 1.32 (0.65-1.98) | 85.5%          | 0.001   |
| NA              | 4              | 1.16 (0.94-1.38) | 19.2%          | 0.294   |
| Diabetics       |                |                  |                |         |
| Y               | 3              | 1.12 (0.81-1.42) | 41.1%          | 0.183   |
| NA              | 4              | 1.34 (0.80-1.87) | 78.3%          | 0.003   |
| Type of disease |                |                  |                |         |
| S               | 2              | 1.75 (1.19-2.31) | 52.0%          | 0.149   |
| N/NA            | 5              | 1.13 (0.98-1.27) | 10.8%          | 0.345   |
| NOS             |                |                  |                |         |
| 6               | 4              | 1.16 (1.05-1.29) | 0.00%          | 0.615   |
| 7               | 3              | 1.37 (0.57-2.17) | 84.9%          | 0.001   |

Y: subjects contain diabetics; S: some PE patients were combined with DVT;  
N/NA: No PE patients were combined with DVT or not available.

**Supplementary Table 6. The sensitivity analysis for studies about early death of PE: by deleting one of the studies and then analyzing the pooling effect and heterogeneity of the remaining papers.**

| Author         | No. of patients | WMD (95%CI)      | Heterogeneity  |         |
|----------------|-----------------|------------------|----------------|---------|
|                |                 |                  | I <sup>2</sup> | P-value |
| Araz, O.       | 1271            | 1.26 (0.9-1.62)  | 72.2%          | 0.003   |
| In, E.         | 1603            | 1.22 (0.92-1.52) | 72.8%          | 0.002   |
| Bozkus, F.     | 1622            | 1.24 (0.83-1.65) | 72.8%          | 0.003   |
| Hilal, E.      | 1502            | 1.31 (1.03-1.59) | 66.9%          | 0.010   |
| Kostrubiec, M. | 1519            | 1.28 (0.99-1.58) | 70.8%          | 0.004   |
| Akgullu, C.    | 1505            | 1.21 (0.91-1.52) | 72.7%          | 0.003   |
| Ertem, A       | 1447            | 1.15 (1.03-1.27) | 0.6%           | 0.412   |

**Supplementary Table 7. Risk factors for PE.**

| <b>Risk factors</b>         | <b>References</b> |
|-----------------------------|-------------------|
| Age                         | [1]               |
| Gender                      | [2, 3]            |
| Race                        | [4, 5]            |
| Thrombophilia               | [6, 7]            |
| Hospitalization             | [8]               |
| Surgery                     | [9]               |
| Cancers                     | [10–12]           |
| Obesity                     | [13, 14]          |
| Estrogen                    | [15]              |
| Prior history of thrombosis | [16, 17]          |
| Central venous catheters    | [18]              |
| Cardiovascular disease      | [19, 20]          |
| Pregnancy                   | [21]              |
| Immunological disease       | [22–24]           |
| Diabetes                    | [25]              |

Abbreviations: PE (Pulmonary embolism), MPV (Mean platelet volume), SD (Standard deviation), CI (Confidence intervals), EDTA (Ethylenediamine tetraacetic acid), NOS (Newcastle–Ottawa Scale), WMD (Weighted mean differences),  $I^2$  (I-square).

### Supplementary References

- Righini M, Goehring C, Bounameaux H, Perrier A. Effects of age on the performance of common diagnostic tests for pulmonary embolism. *Am J Med.* 2000; 109:357–61. [https://doi.org/10.1016/s0002-9343\(00\)00493-9](https://doi.org/10.1016/s0002-9343(00)00493-9) PMID:11020391
- Tanabe Y, Yamamoto T, Murata T, Mabuchi K, Hara N, Mizuno A, Nozato T, Hisatake S, Obayashi T, Takayama M, Nagao K. Gender Differences Among Patients With Acute Pulmonary Embolism. *Am J Cardiol.* 2018; 122:1079–84. <https://doi.org/10.1016/j.amjcard.2018.05.042> PMID:30072127
- Jarman AF, Mumma BE, Singh KS, Nowadly CD, Maughan BC. Crucial considerations: Sex differences in the epidemiology, diagnosis, treatment, and outcomes of acute pulmonary embolism in non-pregnant adult patients. *J Am Coll Emerg Physicians Open.* 2021; 2:e12378. <https://doi.org/10.1002/emp2.12378> PMID:33532761
- White RH, Keenan CR. Effects of race and ethnicity on the incidence of venous thromboembolism. *Thromb Res.* 2009 (Suppl 4); 123:S11–17. [https://doi.org/10.1016/S0049-3848\(09\)70136-7](https://doi.org/10.1016/S0049-3848(09)70136-7) PMID:19303496
- Keenan CR, White RH. The effects of race/ethnicity and sex on the risk of venous thromboembolism. *Curr Opin Pulm Med.* 2007; 13:377–83. <https://doi.org/10.1097/MCP.0b013e3281eb8ef0> PMID:17940480
- Lian TY, Lu D, Yan XX, Tan JS, Peng FH, Zhu YJ, Wei YP, Wu T, Sun K, Jiang X, Hua L, Jing ZC. Association between congenital thrombophilia and outcomes in pulmonary embolism patients. *Blood Adv.* 2020; 4:5958–65. <https://doi.org/10.1182/bloodadvances.2020002955> PMID:33275768
- Obaid M, El-Menyar A, Asim M, Al-Thani H. Prevalence and Outcomes of Thrombophilia in Patients with Acute Pulmonary Embolism. *Vasc Health Risk Manag.* 2020; 16:75–85. <https://doi.org/10.2147/VHRM.S241649> PMID:32214817
- Aujesky D, Roy PM, Verschuren F, Righini M, Osterwalder J, Egloff M, Renaud B, Verhamme P, Stone RA, Legall C, Sanchez O, Pugh NA, N'gako A, et al. Outpatient versus inpatient treatment for patients with acute pulmonary embolism: an international,

- open-label, randomised, non-inferiority trial. *Lancet*. 2011; 378:41–48.  
[https://doi.org/10.1016/S0140-6736\(11\)60824-6](https://doi.org/10.1016/S0140-6736(11)60824-6)  
 PMID:[21703676](https://pubmed.ncbi.nlm.nih.gov/21703676/)
9. Venclauskas L, Llau JV, Jenny JY, Kjaersgaard-Andersen P, Jans Ø, and ESA VTE Guidelines Task Force. European guidelines on perioperative venous thromboembolism prophylaxis: Day surgery and fast-track surgery. *Eur J Anaesthesiol*. 2018; 35:134–38.  
<https://doi.org/10.1097/EJA.0000000000000706>  
 PMID:[29112544](https://pubmed.ncbi.nlm.nih.gov/29112544/)
  10. Ma L, Wen Z. Risk factors and prognosis of pulmonary embolism in patients with lung cancer. *Medicine (Baltimore)*. 2017; 96:e6638.  
<https://doi.org/10.1097/MD.00000000000006638>  
 PMID:[28422863](https://pubmed.ncbi.nlm.nih.gov/28422863/)
  11. Kraaijpoel N, Bleker SM, Meyer G, Mahé I, Muñoz A, Bertoletti L, Bartels-Rutten A, Beyer-Westendorf J, Porreca E, Boulon C, van Es N, Iosub DI, Couturaud F, et al, and UPE investigators. Treatment and Long-Term Clinical Outcomes of Incidental Pulmonary Embolism in Patients With Cancer: An International Prospective Cohort Study. *J Clin Oncol*. 2019; 37:1713–20.  
<https://doi.org/10.1200/JCO.18.01977> PMID:[31116676](https://pubmed.ncbi.nlm.nih.gov/31116676/)
  12. Silva P, Rosales M, Milheiro MJ, Santos LL. Pulmonary Embolism in Ambulatory Oncologic Patients. *Acta Med Port*. 2015; 28:463–68.  
 PMID:[26574981](https://pubmed.ncbi.nlm.nih.gov/26574981/)
  13. Sloan M, Sheth N, Lee GC. Is Obesity Associated With Increased Risk of Deep Vein Thrombosis or Pulmonary Embolism After Hip and Knee Arthroplasty? A Large Database Study. *Clin Orthop Relat Res*. 2019; 477: 523–32.  
<https://doi.org/10.1097/CORR.0000000000000615>  
 PMID:[30624321](https://pubmed.ncbi.nlm.nih.gov/30624321/)
  14. Movahed MR, Khoubyari R, Hashemzadeh M, Hashemzadeh M. Obesity is strongly and independently associated with a higher prevalence of pulmonary embolism. *Respir Investig*. 2019; 57: 376–79.  
<https://doi.org/10.1016/j.resinv.2019.01.003>  
 PMID:[30770232](https://pubmed.ncbi.nlm.nih.gov/30770232/)
  15. Weill A, Dalichampt M, Raguideau F, Ricordeau P, Blotière PO, Rudant J, Alla F, Zureik M. Low dose oestrogen combined oral contraception and risk of pulmonary embolism, stroke, and myocardial infarction in five million French women: cohort study. *BMJ*. 2016; 353:i2002.  
<https://doi.org/10.1136/bmj.i2002> PMID:[27164970](https://pubmed.ncbi.nlm.nih.gov/27164970/)
  16. Kim SH, Patel N, Thapar K, Pandurangadu AV, Bahl A. Isolated proximal greater saphenous vein thrombosis and the risk of propagation to deep vein thrombosis and pulmonary embolism. *Vasc Health Risk Manag*. 2018; 14:129–35.  
<https://doi.org/10.2147/VHRM.S164190>  
 PMID:[29928127](https://pubmed.ncbi.nlm.nih.gov/29928127/)
  17. Hwang HG, Choi WI, Lee B, Lee CW. Incidence and Risk Factors of Recurrent Venous Thromboembolism after Pulmonary Embolism. *Tuberc Respir Dis (Seoul)*. 2019; 82:341–47.  
<https://doi.org/10.4046/trd.2019.0019>  
 PMID:[31172708](https://pubmed.ncbi.nlm.nih.gov/31172708/)
  18. Al-Asadi O, Almusarhed M, Eldeeb H. Predictive risk factors of venous thromboembolism (VTE) associated with peripherally inserted central catheters (PICC) in ambulant solid cancer patients: retrospective single Centre cohort study. *Thromb J*. 2019; 17:2.  
<https://doi.org/10.1186/s12959-019-0191-y>  
 PMID:[30697126](https://pubmed.ncbi.nlm.nih.gov/30697126/)
  19. Protopapas AD, Baig K, Mukherjee D, Athanasiou T. Pulmonary embolism following coronary artery bypass grafting. *J Card Surg*. 2011; 26:181–88.  
<https://doi.org/10.1111/j.1540-8191.2010.01195.x>  
 PMID:[21320163](https://pubmed.ncbi.nlm.nih.gov/21320163/)
  20. Pongmoragot J, Rabinstein AA, Nilanont Y, Swartz RH, Zhou L, Saposnik G, and Investigators of Registry of Canadian Stroke Network (RCSN) and University of Toronto Stroke Program for Stroke Outcomes Research Canada (SORCan [[www.sorcan.ca](http://www.sorcan.ca)]) Working Group. Pulmonary embolism in ischemic stroke: clinical presentation, risk factors, and outcome. *J Am Heart Assoc*. 2013; 2:e000372.  
<https://doi.org/10.1161/JAHA.113.000372>  
 PMID:[24275627](https://pubmed.ncbi.nlm.nih.gov/24275627/)
  21. Dado CD, Levinson AT, Bourjeily G. Pregnancy and Pulmonary Embolism. *Clin Chest Med*. 2018; 39: 525–37.  
<https://doi.org/10.1016/j.ccm.2018.04.007>  
 PMID:[30122177](https://pubmed.ncbi.nlm.nih.gov/30122177/)
  22. You H, Zhao J, Wang Q, Tian X, Li M, Zeng X. Characteristics and risk factors of pulmonary embolism in patients with systemic lupus erythematosus: a case control study. *Clin Exp Rheumatol*. 2020; 38:940–48.  
 PMID:[31969219](https://pubmed.ncbi.nlm.nih.gov/31969219/)
  23. Kridin K, Kridin M, Amber KT, Shalom G, Comaneshter D, Batat E, Cohen AD. The Risk of Pulmonary Embolism in Patients With Pemphigus: A Population-Based Large-Scale Longitudinal Study. *Front Immunol*. 2019; 10:1559.  
<https://doi.org/10.3389/fimmu.2019.01559>  
 PMID:[31396203](https://pubmed.ncbi.nlm.nih.gov/31396203/)
  24. Chung WS, Lin CL, Hsu WH, Kao CH. Inflammatory bowel disease increases the risks of deep vein

thrombosis and pulmonary embolism in the hospitalized patients: a nationwide cohort study. *Thromb Res.* 2015; 135:492–96.  
<https://doi.org/10.1016/j.thromres.2014.12.025>  
PMID:[25596768](https://pubmed.ncbi.nlm.nih.gov/25596768/)

25. Chung WS, Lin CL, Kao CH. Diabetes increases the risk of deep-vein thrombosis and pulmonary embolism. A population-based cohort study. *Thromb Haemost.* 2015; 114:812–18.  
<https://doi.org/10.1160/TH14-10-0868> PMID:[26271946](https://pubmed.ncbi.nlm.nih.gov/26271946/)
