# Supplementary material for: Association between mean platelet volume and pulmonary embolism: a systematic review and meta-analysis
Source: publisher site journal article supplement (doi:10.18632/aging.203205), 2021-07-02
Supplement: Supplementary file [file aging-v13i13-203205-supplementary-material-SD1.pdf]

## SUPPLEMENTARY FIGURES

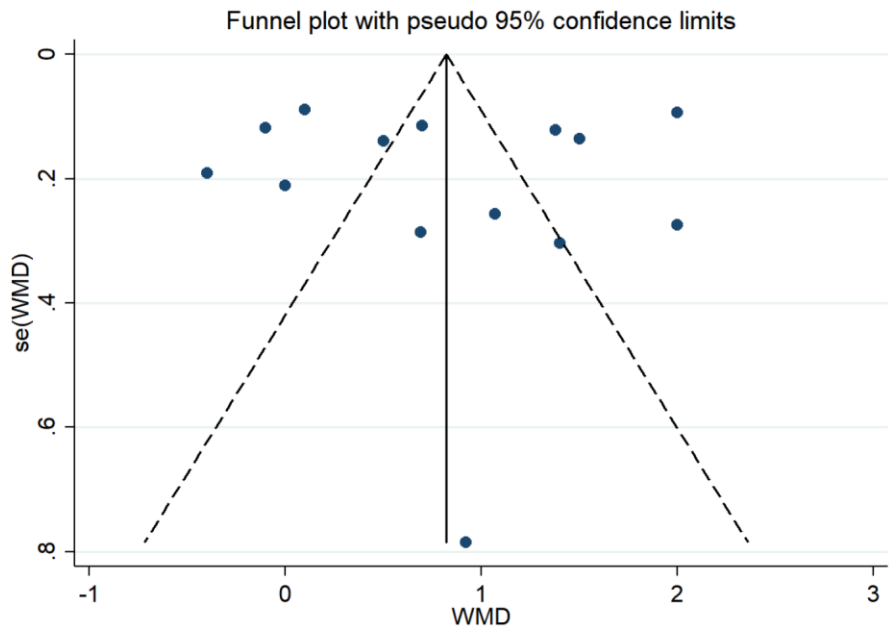

Supplementary Figure 1. The funnel plot of studies of PE.

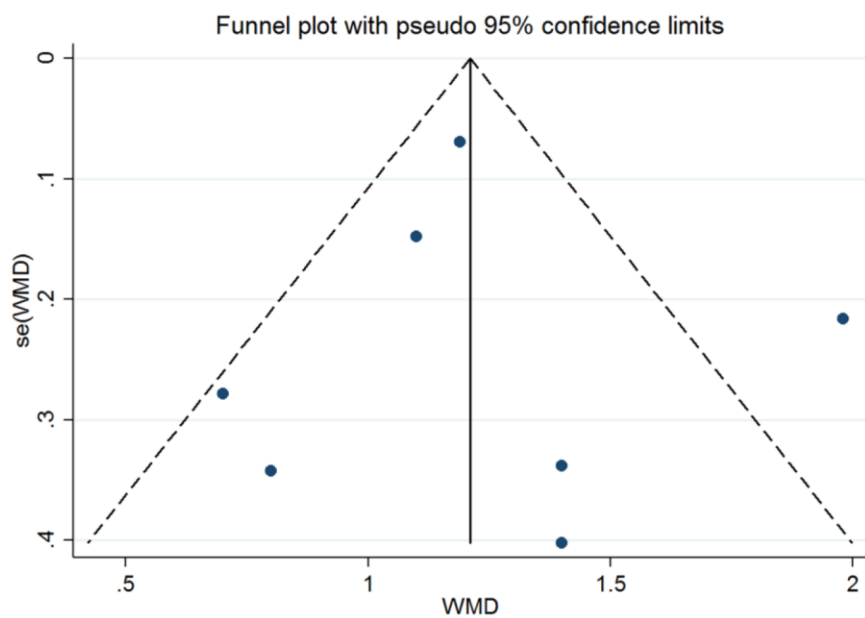

Supplementary Figure 2. The funnel plot of studies of early death of PE.
